# Supplementary material for: Identification of LINC02310 as an enhancer in lung adenocarcinoma and investigation of its regulatory network via comprehensive analyses
Source: BMC Med Genomics. 2020 Dec 11;13:185. doi: 10.1186/s12920-020-00834-6 (PMC7731780; doi:10.1186/s12920-020-00834-6)
Supplement: Supplementary file 6 — Additional file 6. Table S6: GO analysis result (MF terms). [file 12920_2020_834_MOESM6_ESM.xlsx]

## Sheet: Additional file 6--Table SVI
ID	Description	GeneRatio	BgRatio	pvalue	p.adjust	qvalue	geneID	Count
GO:0001228	DNA-binding transcription activator activity, RNA polymerase II-specific	36/383	449/17632	1.53997e-11	9.44001e-09	8.52657e-09	CSRNP1/OTX1/GRHL3/SOX17/ONECUT2/E2F2/BARX2/HMGA1/HMGA2/E2F7/HOXC13/ZIC2/KLF4/HOXC11/HOXC10/MESP1/OVOL1/LHX2/MESP2/POU4F1/SOX11/SIX1/PAX9/MYCN/NR4A3/DLX5/DLX3/TLX1/ISL1/SOX21/ZIC1/HNF4A/NEUROD1/ALX1/GBX2/DLX2	36
GO:0001077	proximal promoter DNA-binding transcription activator activity, RNA polymerase II-specific	25/383	298/17632	8.90611e-09	2.72972e-06	2.46559e-06	OTX1/ONECUT2/E2F2/HMGA2/E2F7/HOXC13/ZIC2/KLF4/HOXC11/MESP1/LHX2/MESP2/POU4F1/SOX11/SIX1/MYCN/NR4A3/DLX5/DLX3/TLX1/ISL1/SOX21/ZIC1/HNF4A/NEUROD1	25
GO:0000982	transcription factor activity, RNA polymerase II proximal promoter sequence-specific DNA binding	30/383	447/17632	4.92991e-08	1.00734e-05	9.0987e-06	OTX1/ONECUT2/E2F2/HMGA2/TBX3/E2F7/HOXC13/ZIC2/KLF4/HOXC11/MESP1/OVOL1/LHX2/MESP2/POU4F1/SOX11/SALL1/SIX1/MYCN/NR4A3/DLX5/DLX3/TLX1/ISL1/SOX21/ZIC1/INSM1/HNF4A/GSC/NEUROD1	30
GO:0031406	carboxylic acid binding	17/383	192/17632	1.04309e-06	0.000159853	0.000144385	CPS1/GAD1/EGLN3/CYP27C1/ALB/PLOD2/GCLC/GLDC/CEMIP/ST8SIA2/CYP4F11/HNF4A/NCAN/UGT1A1/UGT1A7/UGT1A8/UGT1A3	17
GO:0043177	organic acid binding	17/383	204/17632	2.4111e-06	0.000295601	0.000266998	CPS1/GAD1/EGLN3/CYP27C1/ALB/PLOD2/GCLC/GLDC/CEMIP/ST8SIA2/CYP4F11/HNF4A/NCAN/UGT1A1/UGT1A7/UGT1A8/UGT1A3	17
GO:0005539	glycosaminoglycan binding	16/383	222/17632	2.94768e-05	0.00301154	0.00272014	TMEM184A/COL11A1/MDK/SLIT2/THBS2/TGFBR3/ADAMTS1/ABI3BP/SULF1/COL5A1/PCOLCE2/CEMIP/RSPO2/HABP2/NCAN/TENM1	16
GO:0001972	retinoic acid binding	5/383	19/17632	4.26149e-05	0.00373185	0.00337075	CYP27C1/UGT1A1/UGT1A7/UGT1A8/UGT1A3	5
GO:0015020	glucuronosyltransferase activity	6/383	32/17632	5.67379e-05	0.00434754	0.00392686	UGT1A6/UGT1A10/UGT1A1/UGT1A7/UGT1A8/UGT1A3	6
GO:0033293	monocarboxylic acid binding	8/383	64/17632	7.04996e-05	0.00480181	0.00433717	CYP27C1/ALB/CYP4F11/HNF4A/UGT1A1/UGT1A7/UGT1A8/UGT1A3	8
GO:0008201	heparin binding	12/383	163/17632	0.000237434	0.0145547	0.0131463	TMEM184A/COL11A1/MDK/SLIT2/THBS2/TGFBR3/ADAMTS1/ABI3BP/COL5A1/PCOLCE2/RSPO2/TENM1	12
GO:0035173	histone kinase activity	4/383	17/17632	0.000416819	0.0232282	0.0209805	AURKB/AURKA/CHEK1/CDK1	4
GO:0005506	iron ion binding	11/383	152/17632	0.000495261	0.0252996	0.0228515	XDH/CDO1/EGLN3/PAH/FA2H/CYP27C1/PLOD2/CYP3A7/CYP4F11/CYP4F3/CYP2B6	11
GO:1901681	sulfur compound binding	14/383	242/17632	0.000868036	0.0391583	0.0353692	TMEM184A/COL11A1/MDK/SLIT2/THBS2/PTGES/TGFBR3/ADAMTS1/ABI3BP/COL5A1/PCOLCE2/HPSE2/RSPO2/TENM1	14
GO:0005501	retinoid binding	5/383	35/17632	0.000894316	0.0391583	0.0353692	CYP27C1/UGT1A1/UGT1A7/UGT1A8/UGT1A3	5
GO:0016595	glutamate binding	3/383	10/17632	0.0010893	0.0444021	0.0401056	CPS1/GAD1/GCLC	3
GO:0019840	isoprenoid binding	5/383	37/17632	0.00115895	0.0444021	0.0401056	CYP27C1/UGT1A1/UGT1A7/UGT1A8/UGT1A3	5
GO:0050840	extracellular matrix binding	6/383	56/17632	0.00131201	0.0473096	0.0427318	COL11A1/CLEC14A/SLIT2/LYPD3/SPOCK1/LRRC15	6
