# Supplementary material for: Identification of LINC02310 as an enhancer in lung adenocarcinoma and investigation of its regulatory network via comprehensive analyses
Source: BMC Med Genomics. 2020 Dec 11;13:185. doi: 10.1186/s12920-020-00834-6 (PMC7731780; doi:10.1186/s12920-020-00834-6)
Supplement: Supplementary file 7 — Additional file 7. Table S7. GO analysis result (CC terms). [file 12920_2020_834_MOESM7_ESM.xlsx]

## Sheet: Additional file 7--Table SVII
ID	Description	GeneRatio	BgRatio	pvalue	p.adjust	qvalue	geneID	Count
GO:0005876	spindle microtubule	10/402	54/19659	1.22661e-07	4.74696e-05	4.13172e-05	KIF4A/KIF18B/BIRC5/SKA3/AURKB/KIF11/NUSAP1/PRC1/AURKA/CDK1	10
GO:0005819	spindle	22/402	333/19659	1.56606e-06	0.000303033	0.000263757	KIF4A/NEK2/KIF14/DLGAP5/KIF18B/TPX2/BIRC5/CDCA8/SKA3/SGO1/AURKB/KIF11/NUSAP1/ESPL1/PRC1/KIF15/AURKA/KIF23/ECT2/SHCBP1/CDK1/FAM83D	22
GO:0030496	midbody	15/402	172/19659	2.65102e-06	0.000341982	0.000297658	KIF4A/NEK2/KIF14/ANLN/BIRC5/CDCA8/AURKB/SLC2A1/PRC1/AURKA/KIF23/ECT2/SHCBP1/CDK1/CIT	15
GO:0072686	mitotic spindle	11/402	101/19659	6.97034e-06	0.00067438	0.000586976	KIF18B/TPX2/AURKB/KIF11/NUSAP1/ESPL1/AURKA/KIF23/ECT2/CDK1/FAM83D	11
GO:0005583	fibrillar collagen trimer	4/402	11/19659	5.07284e-05	0.00327198	0.00284791	COL11A1/COL1A1/COL5A2/COL5A1	4
GO:0098643	banded collagen fibril	4/402	11/19659	5.07284e-05	0.00327198	0.00284791	COL11A1/COL1A1/COL5A2/COL5A1	4
GO:0010369	chromocenter	4/402	14/19659	0.000146556	0.00772753	0.00672599	CDCA8/AURKB/OIP5/SALL1	4
GO:0000792	heterochromatin	8/402	76/19659	0.000159742	0.00772753	0.00672599	UHRF1/CENPA/SALL4/HMGA1/HMGA2/CDKN2A/CBX2/SALL1	8
GO:0000793	condensed chromosome	14/402	221/19659	0.000193492	0.00832015	0.0072418	TOP2A/NEK2/BIRC5/SKA3/SGO1/CENPA/AURKB/MKI67/NCAPG/ZWINT/CDCA5/AURKA/CHEK1/RAD51	14
GO:0098687	chromosomal region	18/402	346/19659	0.000297726	0.011522	0.0100287	NEK2/BIRC5/CDCA8/SKA3/SGO1/CENPA/AURKB/NCAPG/ZWINT/CDCA5/DNA2/AURKA/CHEK1/CDK1/RAD51/MCM2/OIP5/SALL1	18
GO:0044420	extracellular matrix component	6/402	49/19659	0.000468443	0.0143987	0.0125325	COL11A1/COL1A1/MFAP4/COL5A2/COL5A1/PTPRZ1	6
GO:0031012	extracellular matrix	22/402	490/19659	0.000516356	0.0143987	0.0125325	CTHRC1/MMP11/COL11A1/LRRC32/CLEC14A/MMRN2/THBS2/TGFBR3/SPP2/ADAMTS1/COL1A1/COCH/MFAP4/ABI3BP/COL5A2/COL5A1/TFPI2/HPSE2/ENTPD2/LRRC15/NCAN/PTPRZ1	22
GO:0098644	complex of collagen trimers	4/402	19/19659	0.000523325	0.0143987	0.0125325	COL11A1/COL1A1/COL5A2/COL5A1	4
GO:0045121	membrane raft	16/402	304/19659	0.00056129	0.0143987	0.0125325	S1PR1/EMP2/EDNRB/CAVIN2/CAV1/SLC2A1/CAVIN1/PROM2/ARC/CAV2/OLR1/SULF1/DLC1/ANGPT1/RET/NTSR1	16
GO:0098857	membrane microdomain	16/402	305/19659	0.000581545	0.0143987	0.0125325	S1PR1/EMP2/EDNRB/CAVIN2/CAV1/SLC2A1/CAVIN1/PROM2/ARC/CAV2/OLR1/SULF1/DLC1/ANGPT1/RET/NTSR1	16
GO:0051233	spindle midzone	5/402	34/19659	0.000595295	0.0143987	0.0125325	KIF14/KIF18B/CDCA8/AURKB/AURKA	5
GO:0000775	chromosome, centromeric region	12/402	194/19659	0.000675038	0.0145335	0.0126498	NEK2/BIRC5/CDCA8/SKA3/SGO1/CENPA/AURKB/NCAPG/ZWINT/CDCA5/AURKA/OIP5	12
GO:0000779	condensed chromosome, centromeric region	9/402	117/19659	0.000675976	0.0145335	0.0126498	NEK2/BIRC5/SKA3/SGO1/CENPA/AURKB/NCAPG/ZWINT/AURKA	9
GO:0005871	kinesin complex	6/402	54/19659	0.000794108	0.0161747	0.0140784	KIF4A/KIF14/KIF18B/KIF11/KIF15/KIF23	6
GO:0098589	membrane region	16/402	316/19659	0.000849003	0.0164282	0.014299	S1PR1/EMP2/EDNRB/CAVIN2/CAV1/SLC2A1/CAVIN1/PROM2/ARC/CAV2/OLR1/SULF1/DLC1/ANGPT1/RET/NTSR1	16
GO:0005875	microtubule associated complex	10/402	147/19659	0.000905276	0.016683	0.0145207	KIF4A/KIF14/KIF18B/BIRC5/CDCA8/AURKB/KIF11/KIF15/AURKA/KIF23	10
GO:0043025	neuronal cell body	21/402	483/19659	0.00103158	0.0181464	0.0157945	ACVRL1/TPX2/SPTBN2/SYT7/AURKA/GPM6A/ARC/NQO1/RAC3/GRIA1/GAL/EPHB2/DRP2/UCHL1/CIT/NPTX2/RET/CNTNAP2/DPYSL5/NTSR1/SH3GL2	21
GO:0005667	transcription factor complex	17/402	356/19659	0.00112696	0.0189623	0.0165047	SOX7/SOX17/E2F2/BARX2/HOXB9/HMGA1/E2F7/KLF4/DACH1/SOX11/SIX1/NR4A3/SOX21/GSC/NEUROD1/ALX1/SOX3	17
GO:0033267	axon part	17/402	373/19659	0.00185349	0.0298875	0.0260139	KIF4A/TPX2/GPRIN1/SYT7/AURKA/GPM6A/IGF2BP1/GAD1/SCN8A/RAC3/GRIA1/UCHL1/SPOCK1/NPTX2/CNTNAP2/NTSR1/NEFL	17
GO:0030133	transport vesicle	17/402	381/19659	0.00231258	0.0357988	0.031159	TMEM184A/SYT12/STX1A/KDELR3/SYT7/CAV2/RAB3B/CEACAM1/GRIA1/VGF/SYNGR3/EDN1/MME/NPTX1/TRIM9/BDNF/SH3GL2	17
GO:0031616	spindle pole centrosome	3/402	14/19659	0.00261212	0.0375155	0.0326532	DLGAP5/AURKB/AURKA	3
GO:0044798	nuclear transcription factor complex	11/402	198/19659	0.00261736	0.0375155	0.0326532	SOX7/SOX17/E2F2/HOXB9/HMGA1/E2F7/KLF4/SOX11/SOX21/NEUROD1/SOX3	11
