# Supplementary material for: Identification of LINC02310 as an enhancer in lung adenocarcinoma and investigation of its regulatory network via comprehensive analyses
Source: BMC Med Genomics. 2020 Dec 11;13:185. doi: 10.1186/s12920-020-00834-6 (PMC7731780; doi:10.1186/s12920-020-00834-6)
Supplement: Supplementary file 8 — Additional file 8. Table S8: KEGG analysis result. [file 12920_2020_834_MOESM8_ESM.xlsx]

## Sheet: Additional file 8--Table SVIII
ID	Description	GeneRatio	BgRatio	pvalue	p.adjust	qvalue	geneID	Count
hsa00830	Retinol metabolism	10/177	67/8011	1.79403e-06	0.000380335	0.000347476	339761/125/1551/54578/54575/54658/54577/54576/1555/54659	10
hsa00053	Ascorbate and aldarate metabolism	6/177	27/8011	2.15081e-05	0.00186031	0.00169959	54578/54575/54658/54577/54576/54659	6
hsa00982	Drug metabolism - cytochrome P450	9/177	72/8011	2.63251e-05	0.00186031	0.00169959	125/222/54578/54575/54658/54577/54576/1555/54659	9
hsa00980	Metabolism of xenobiotics by cytochrome P450	9/177	76/8011	4.08482e-05	0.00197295	0.0018025	125/222/54578/54575/54658/54577/54576/1555/54659	9
hsa00140	Steroid hormone biosynthesis	8/177	60/8011	4.65319e-05	0.00197295	0.0018025	1551/54578/54575/6718/54658/54577/54576/54659	8
hsa05204	Chemical carcinogenesis	9/177	82/8011	7.50006e-05	0.00260286	0.00237798	125/222/1551/54578/54575/54658/54577/54576/54659	9
hsa00040	Pentose and glucuronate interconversions	6/177	34/8011	8.59434e-05	0.00260286	0.00237798	54578/54575/54658/54577/54576/54659	6
hsa04115	p53 signaling pathway	8/177	72/8011	0.00017375	0.00460438	0.00420658	51512/898/1111/983/9134/1029/3486/5268	8
hsa00860	Porphyrin and chlorophyll metabolism	6/177	42/8011	0.000289566	0.00682089	0.0062316	54578/54575/54658/54577/54576/54659	6
hsa04110	Cell cycle	10/177	124/8011	0.00039878	0.00845415	0.00772375	23594/9700/898/1111/983/1870/993/4171/9134/1029	10
hsa00983	Drug metabolism - other enzymes	7/177	79/8011	0.00173453	0.033429	0.0305409	7498/54578/54575/54658/54577/54576/54659	7
